# Supplementary material
Source: PubMed Central journal article supplement (PMC9261529)

Supplementary Figure S1.

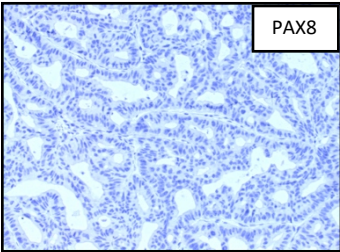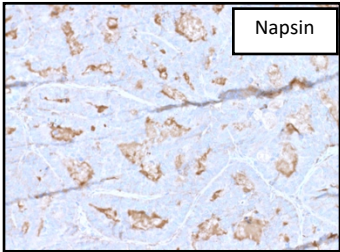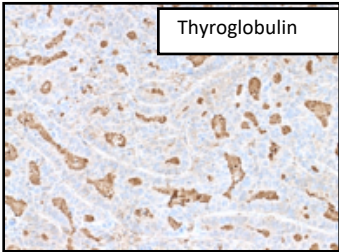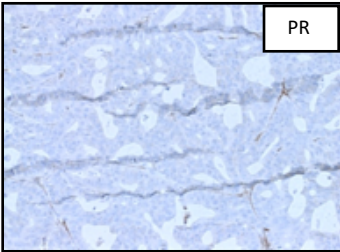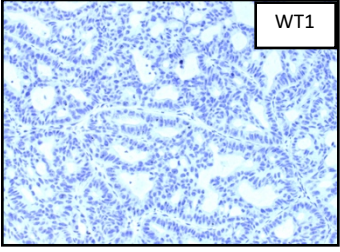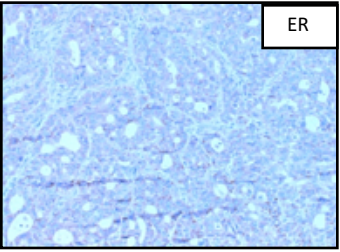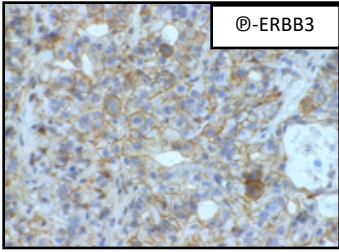

# Supplementary Figure S2.

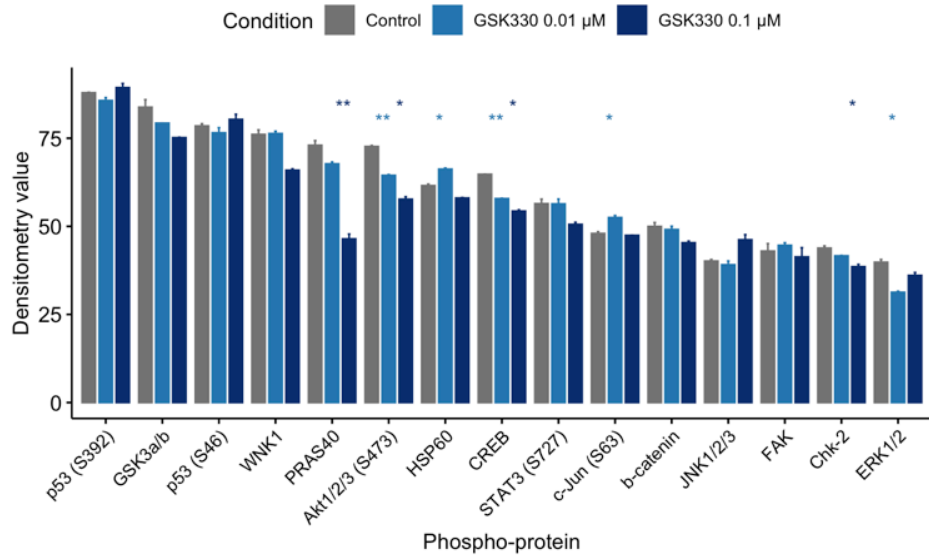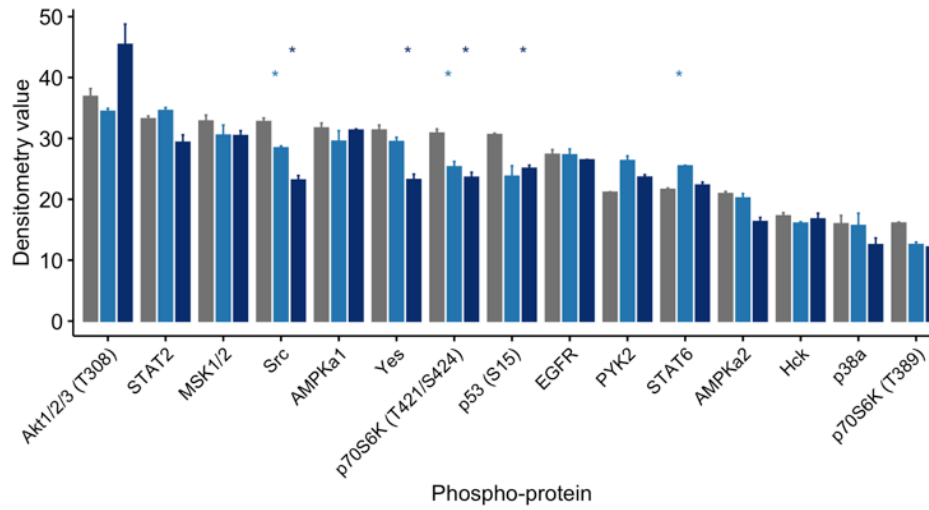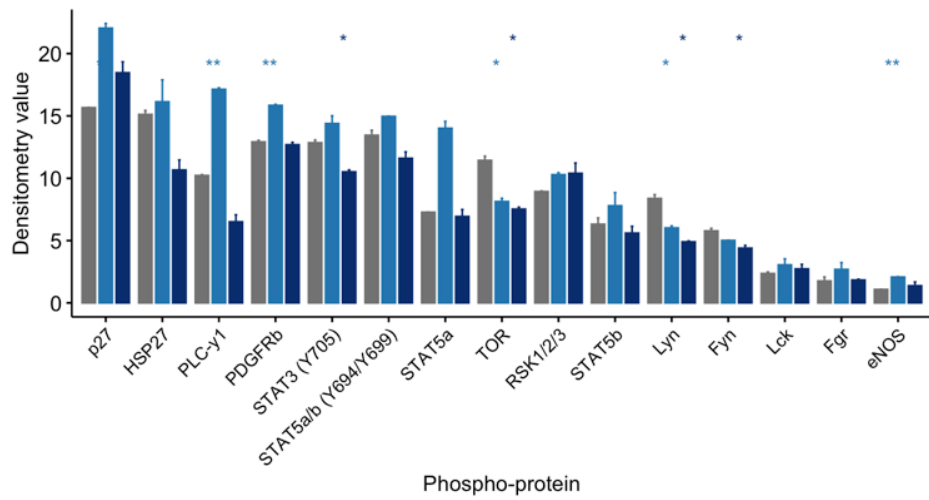

# Supplementary Figure S3.

**A**

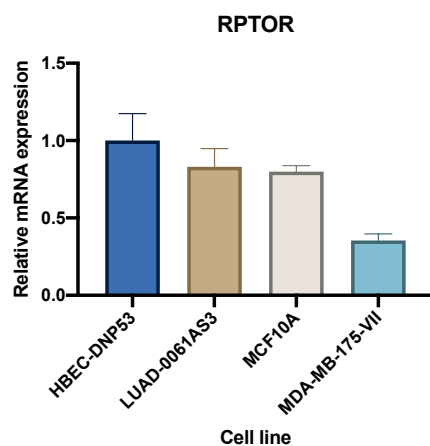

**B**

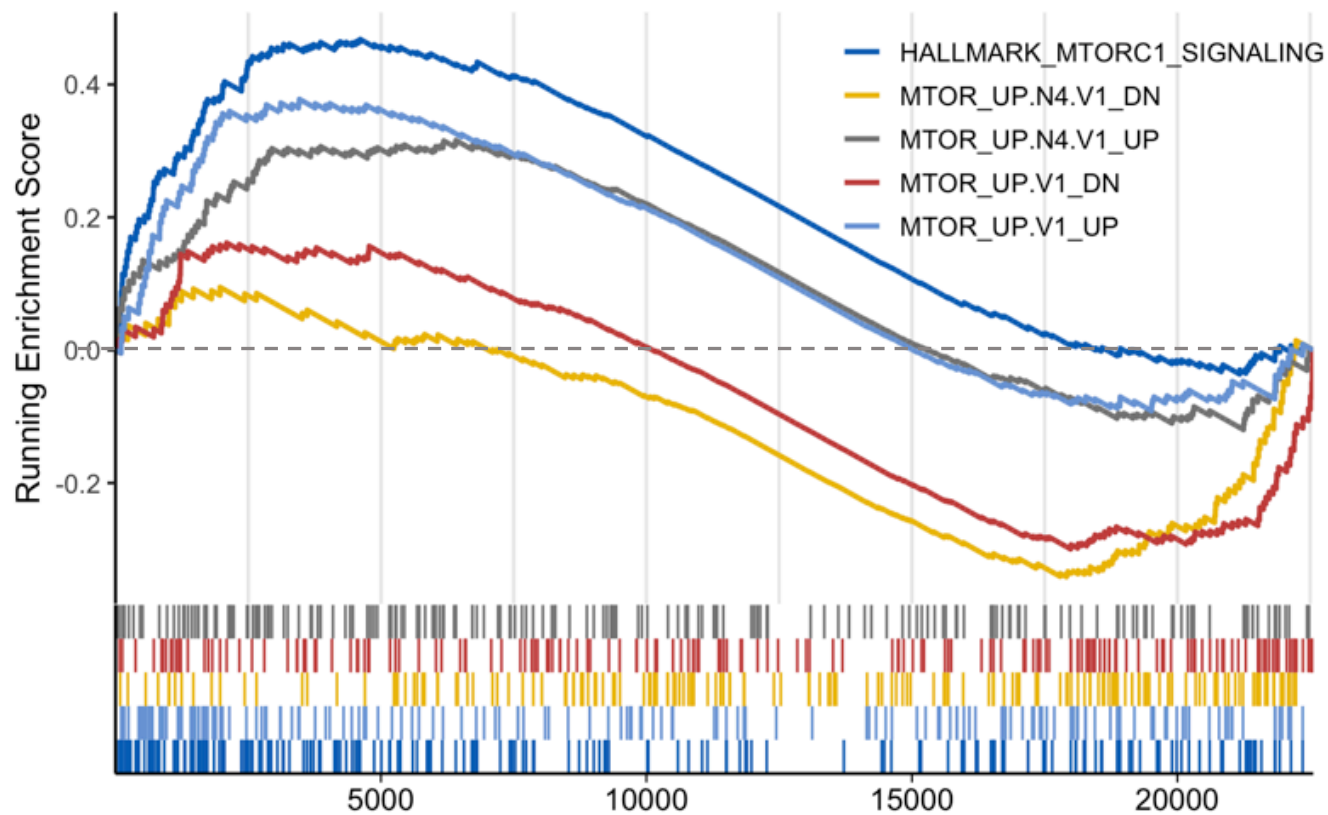

# Supplementary Figure S4.

**A**

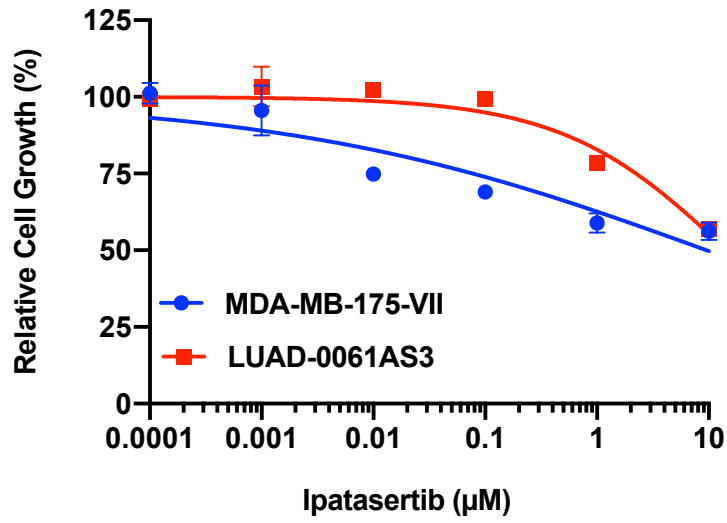

**B**

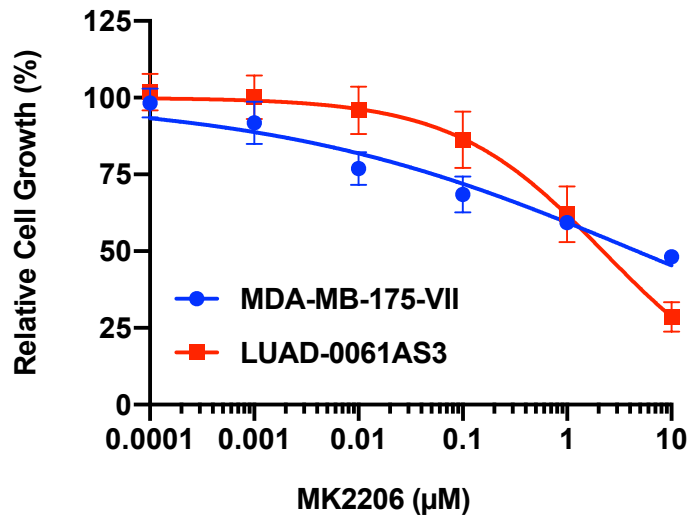

# Supplementary Figure S5.

**A**

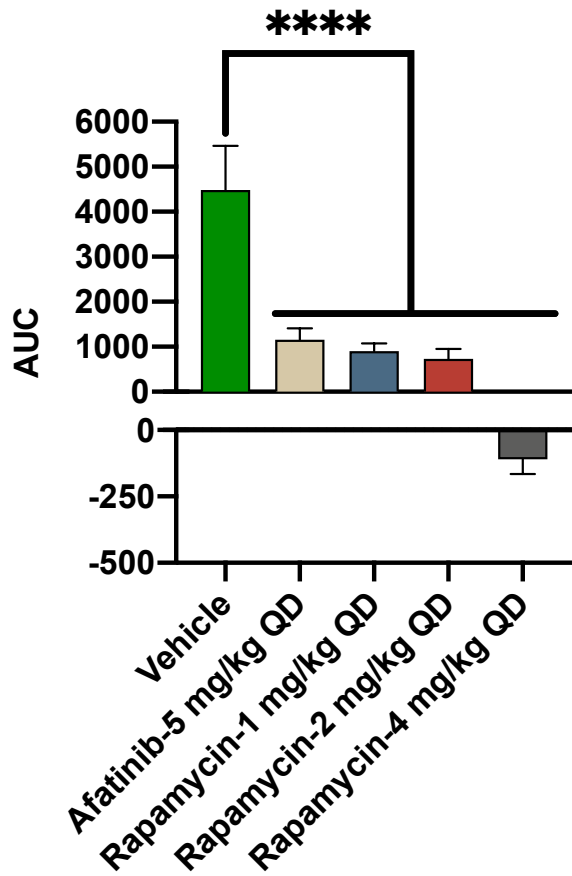

**B**

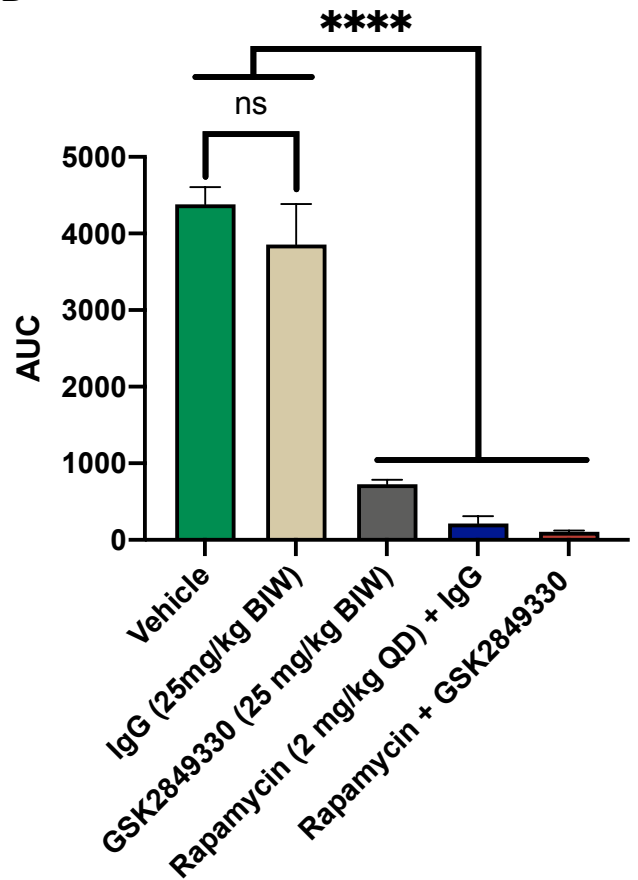

**C**

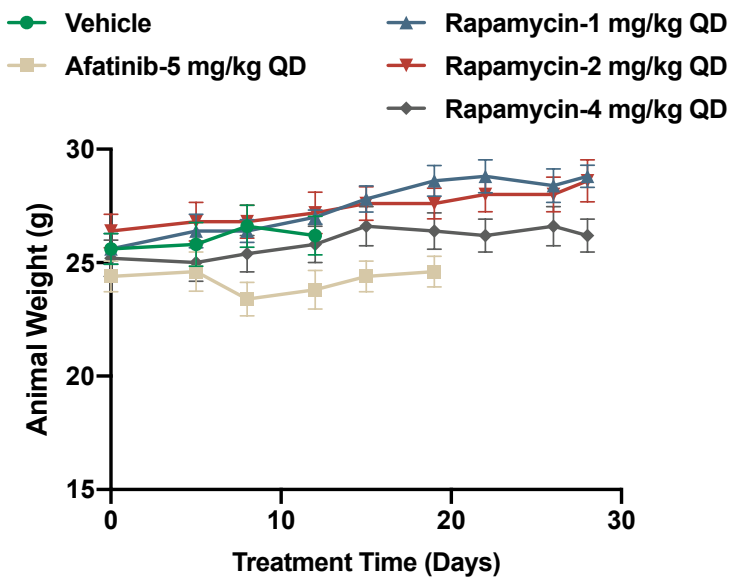

**D**

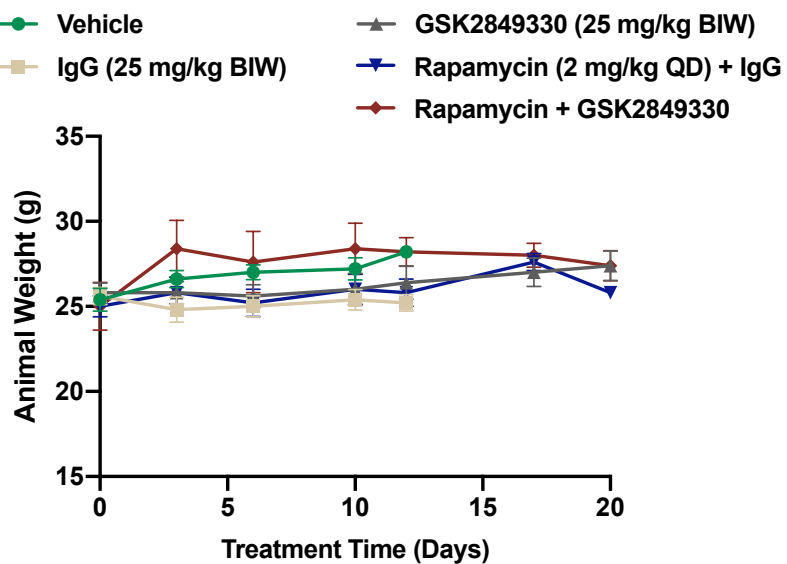

Supplement: NIHMS1819834-supplement-Supplementary_Figures.pdf [file NIHMS1819834-supplement-Supplementary_Figures.pdf]
